# Supplementary material
Source: MDPI journal article supplement (https://www.mdpi.com/2313-0105/10/3/80)
Supplement: s1 [file s1]

# Film Thickness Effect in Restructuring NiO into LiNiO<sub>2</sub> Anode for Highly Stable Lithium-Ion Batteries

Thang Phan Nguyen and Il Tae Kim \*

Department of Chemical and Biological Engineering, Gachon University, Seongnam-si 13120,  
Gyeonggi-do, Republic of Korea

\* Correspondence: itkim@gachon.ac.kr

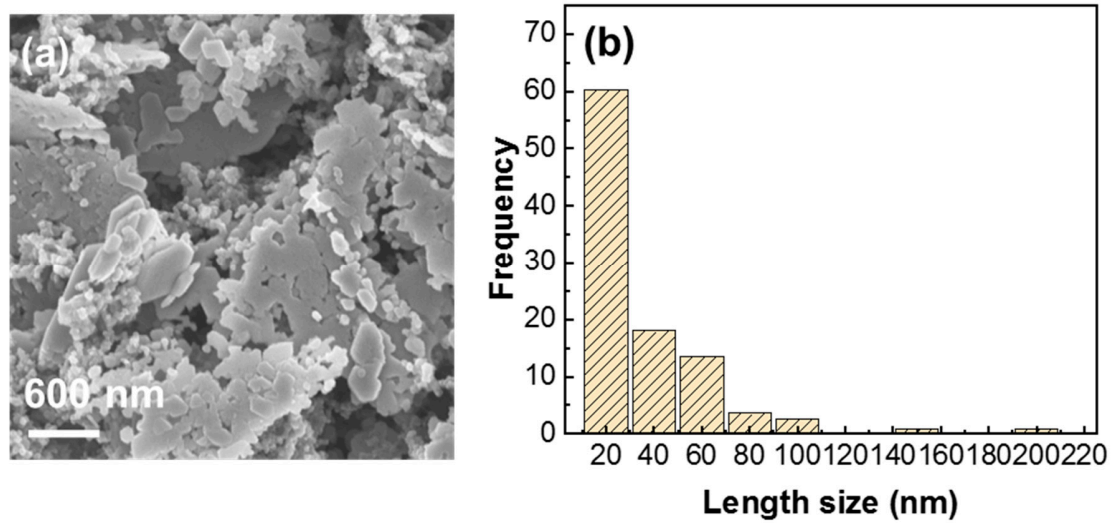

Figure S1. (a) SEM image of NiO NSs and (b) size distribution of NiO NSs.

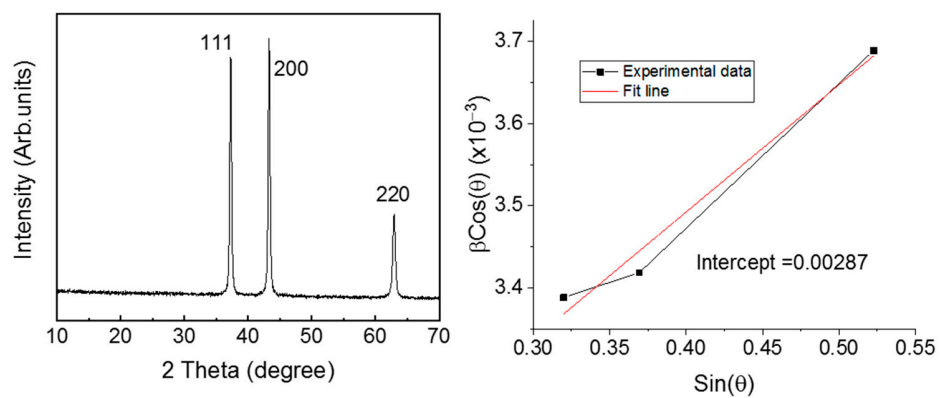

Figure S2. (a) XRD pattern of NiO NSs and (b) the Williamson-Hall plot from the XRD peaks.

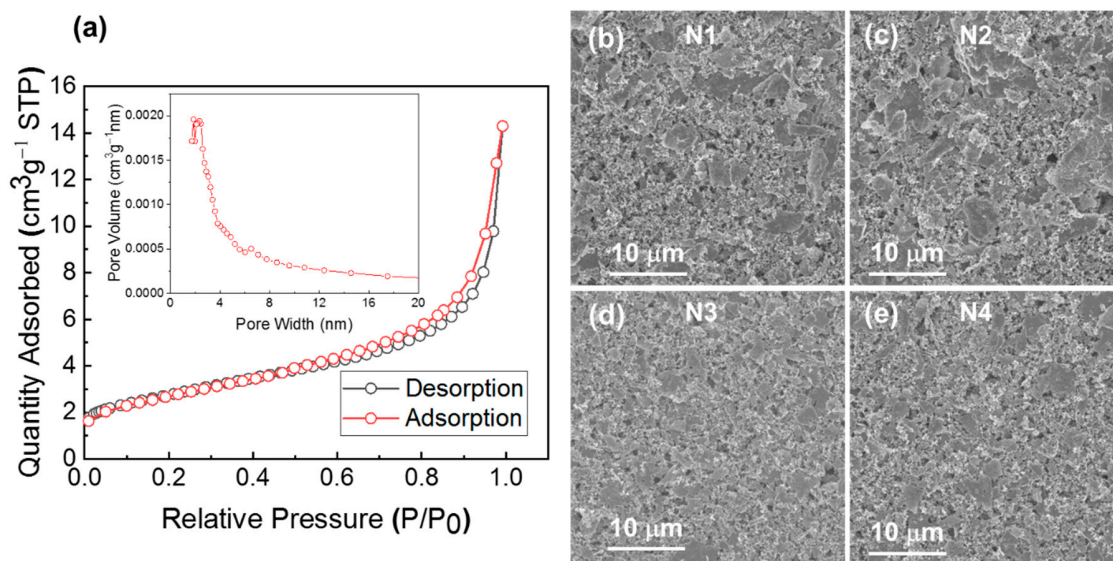

Figure S3. (a) Nitrogen adsorption–desorption isotherm plot of NiO NSs with the inset of pore volume distribution; (b-d) SEM images of N1, N2, N3, and N4 anodes, respectively.

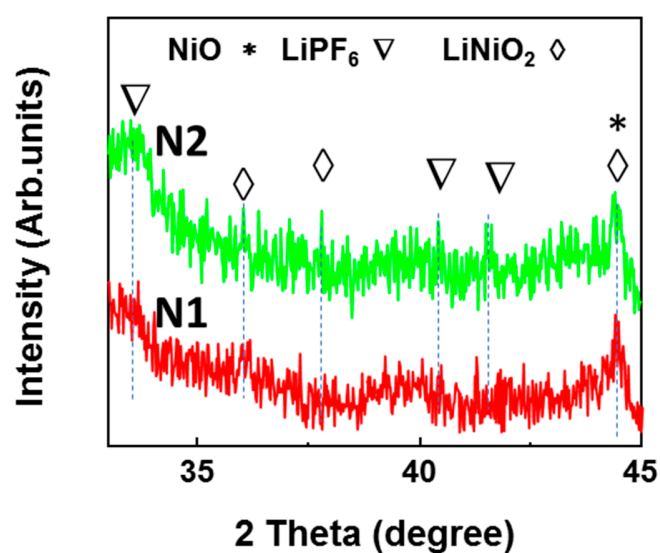

Figure S4. Enlarged XRD patterns in the range of 33–45 ° for N1 and N2 anodes.
